# Supplementary material for: Beyond D’Amico risk classes for predicting recurrence after external beam radiotherapy for prostate cancer: the Candiolo classifier
Source: Springer Nature journal article supplement (doi:10.1186/s13014-016-0599-5), 2016-02-24

**Table 1-S – EUREKA-2 study, Radiotherapy participating centers.**

| <b>Radiotherapy Center</b>                           | <b>Town</b> | <b>Total Number of patients</b> | <b>Number of patients included in this paper</b> |
|------------------------------------------------------|-------------|---------------------------------|--------------------------------------------------|
| FPO-IRCCS Cancer Center of Candiolo                  | Candiolo    | 1,195                           | 1,009                                            |
| Maggiore Hospital, Eastern Piedmont University       | Novara      | 214                             | 200                                              |
| San Luigi Gonzaga Hospital, University of Torino     | Orbassano   | 76                              | 66                                               |
| Civile Hospital                                      | Ivrea       | 962                             | 106                                              |
| Cardinal Massaia Hospital                            | Asti        | 256                             | 220                                              |
| Degli Infermi Hospital                               | Biella      | 235                             | 175                                              |
| European Institute of Oncology, University of Milano | Milano      | 379                             | 292                                              |
| Santa Chiara Hospital, University of Pisa            | Pisa        | 195                             | 174                                              |
| S. Anna Hospital                                     | Como        | 143                             | 136                                              |
| Castelli Hospital                                    | Verbania    | 121                             | 115                                              |
| <b>Total</b>                                         |             | <b>3,776</b>                    | <b>2,493</b>                                     |

**Table 2-S – Candiolo classifier table with Hazard Ratio combinations.**

| initial PSA |      | Positive Cores % |      | Age  |      | GS ≤ 6 |      |       | GS 3 + 4 |      |       | GS 4 + 3 |      |       | GS 8 |      |       | GS 9 - 10 |      |       |
|-------------|------|------------------|------|------|------|--------|------|-------|----------|------|-------|----------|------|-------|------|------|-------|-----------|------|-------|
|             |      |                  |      |      |      | 0,59   | 0,59 | 0,59  | 0,83     | 0,83 | 0,83  | 0,95     | 0,95 | 0,95  | 1,26 | 1,26 | 1,26  | 1,70      | 1,70 | 1,70  |
|             |      |                  |      |      |      | cT1    | cT2  | cT3-4 | cT1      | cT2  | cT3-4 | cT1      | cT2  | cT3-4 | cT1  | cT2  | cT3-4 | cT1       | cT2  | cT3-4 |
|             |      |                  |      |      |      | 0,77   | 0,93 | 1,4   | 0,77     | 0,93 | 1,4   | 0,77     | 0,93 | 1,4   | 0,77 | 0,93 | 1,4   | 0,77      | 0,93 | 1,4   |
| PSA < 7     | 0,63 | 1-20%            | 0,67 | ≥70  | 0,89 | 0,17   | 0,21 | 0,31  | 0,24     | 0,29 | 0,44  | 0,27     | 0,33 | 0,50  | 0,36 | 0,44 | 0,66  | 0,49      | 0,59 | 0,89  |
|             | 0,63 |                  | 0,67 | <70  | 1,12 | 0,21   | 0,26 | 0,39  | 0,30     | 0,36 | 0,55  | 0,35     | 0,42 | 0,63  | 0,46 | 0,55 | 0,83  | 0,62      | 0,75 | 1,13  |
|             | 0,63 | 21-50%           | 0,89 | ≥70  | 0,89 | 0,23   | 0,27 | 0,41  | 0,32     | 0,39 | 0,58  | 0,37     | 0,44 | 0,66  | 0,48 | 0,58 | 0,88  | 0,65      | 0,79 | 1,19  |
|             | 0,63 |                  | 0,89 | <70  | 1,12 | 0,29   | 0,34 | 0,52  | 0,40     | 0,48 | 0,73  | 0,46     | 0,55 | 0,84  | 0,61 | 0,74 | 1,11  | 0,82      | 0,99 | 1,49  |
|             | 0,63 | 51-80%           | 1,11 | ≥70  | 0,89 | 0,28   | 0,34 | 0,51  | 0,40     | 0,48 | 0,72  | 0,46     | 0,55 | 0,83  | 0,60 | 0,73 | 1,10  | 0,81      | 0,98 | 1,48  |
|             | 0,63 |                  | 1,11 | <70  | 1,12 | 0,36   | 0,43 | 0,65  | 0,50     | 0,60 | 0,91  | 0,57     | 0,69 | 1,04  | 0,76 | 0,92 | 1,38  | 1,03      | 1,24 | 1,86  |
|             | 0,63 | 81-100%          | 1,5  | ≥70  | 0,89 | 0,38   | 0,46 | 0,69  | 0,54     | 0,65 | 0,98  | 0,62     | 0,74 | 1,12  | 0,82 | 0,99 | 1,48  | 1,10      | 1,33 | 2,00  |
| 0,63        | 1,5  |                  | <70  | 1,12 | 0,48 | 0,58   | 0,87 | 0,68  | 0,82     | 1,23 | 0,77  | 0,94     | 1,41 | 1,03  | 1,24 | 1,87 | 1,39  | 1,67      | 2,52 |       |
| PSA 7-15    | 0,96 | 1-20%            | 0,67 | ≥70  | 0,89 | 0,26   | 0,31 | 0,47  | 0,37     | 0,44 | 0,67  | 0,42     | 0,51 | 0,76  | 0,56 | 0,67 | 1,01  | 0,75      | 0,91 | 1,36  |
|             | 0,96 |                  | 0,67 | <70  | 1,12 | 0,33   | 0,40 | 0,60  | 0,46     | 0,56 | 0,84  | 0,53     | 0,64 | 0,96  | 0,70 | 0,84 | 1,27  | 0,94      | 1,14 | 1,71  |
|             | 0,96 | 21-50%           | 0,89 | ≥70  | 0,89 | 0,35   | 0,42 | 0,63  | 0,49     | 0,59 | 0,88  | 0,56     | 0,67 | 1,01  | 0,74 | 0,89 | 1,34  | 1,00      | 1,20 | 1,81  |
|             | 0,96 |                  | 0,89 | <70  | 1,12 | 0,43   | 0,53 | 0,79  | 0,61     | 0,74 | 1,11  | 0,70     | 0,85 | 1,27  | 0,93 | 1,12 | 1,69  | 1,25      | 1,51 | 2,28  |
|             | 0,96 | 51-80%           | 1,11 | ≥70  | 0,89 | 0,43   | 0,52 | 0,78  | 0,61     | 0,73 | 1,10  | 0,69     | 0,84 | 1,26  | 0,92 | 1,11 | 1,67  | 1,24      | 1,50 | 2,26  |
|             | 0,96 |                  | 1,11 | <70  | 1,12 | 0,54   | 0,65 | 0,99  | 0,76     | 0,92 | 1,39  | 0,87     | 1,05 | 1,59  | 1,16 | 1,40 | 2,11  | 1,56      | 1,89 | 2,84  |
|             | 0,96 | 81-100%          | 1,5  | ≥70  | 0,89 | 0,58   | 0,70 | 1,06  | 0,82     | 0,99 | 1,49  | 0,94     | 1,13 | 1,70  | 1,24 | 1,50 | 2,26  | 1,68      | 2,03 | 3,05  |
| 0,96        | 1,5  |                  | <70  | 1,12 | 0,73 | 0,88   | 1,33 | 1,03  | 1,24     | 1,87 | 1,18  | 1,42     | 2,15 | 1,56  | 1,89 | 2,84 | 2,11  | 2,55      | 3,84 |       |
| PSA > 15    | 1,65 | 1-20%            | 0,67 | ≥70  | 0,89 | 0,45   | 0,54 | 0,81  | 0,63     | 0,76 | 1,14  | 0,72     | 0,87 | 1,31  | 0,95 | 1,15 | 1,74  | 1,29      | 1,56 | 2,34  |
|             | 1,65 |                  | 0,67 | <70  | 1,12 | 0,56   | 0,68 | 1,02  | 0,79     | 0,96 | 1,44  | 0,91     | 1,09 | 1,65  | 1,20 | 1,45 | 2,18  | 1,62      | 1,96 | 2,95  |
|             | 1,65 | 21-50%           | 0,89 | ≥70  | 0,89 | 0,59   | 0,72 | 1,08  | 0,84     | 1,01 | 1,52  | 0,96     | 1,15 | 1,74  | 1,27 | 1,53 | 2,31  | 1,71      | 2,07 | 3,11  |
|             | 1,65 |                  | 0,89 | <70  | 1,12 | 0,75   | 0,90 | 1,36  | 1,05     | 1,27 | 1,91  | 1,20     | 1,45 | 2,19  | 1,60 | 1,93 | 2,90  | 2,15      | 2,60 | 3,91  |
|             | 1,65 | 51-80%           | 1,11 | ≥70  | 0,89 | 0,74   | 0,89 | 1,35  | 1,04     | 1,26 | 1,89  | 1,19     | 1,44 | 2,17  | 1,58 | 1,91 | 2,88  | 2,13      | 2,58 | 3,88  |
|             | 1,65 |                  | 1,11 | <70  | 1,12 | 0,93   | 1,13 | 1,69  | 1,31     | 1,58 | 2,38  | 1,50     | 1,81 | 2,73  | 1,99 | 2,40 | 3,62  | 2,69      | 3,24 | 4,88  |
|             | 1,65 | 81-100%          | 1,5  | ≥70  | 0,89 | 1,00   | 1,21 | 1,82  | 1,41     | 1,70 | 2,56  | 1,61     | 1,95 | 2,93  | 2,14 | 2,58 | 3,89  | 2,88      | 3,48 | 5,24  |
| 1,65        | 1,5  |                  | <70  | 1,12 | 1,26 | 1,52   | 2,29 | 1,77  | 2,14     | 3,22 | 2,03  | 2,45     | 3,69 | 2,69  | 3,25 | 4,89 | 3,63  | 4,38      | 6,60 |       |

Table 3-S – Candiolo classifier table with complete patients' distribution.

| initial PSA | Positive Cores % | Age | GS ≤ 6 |     |       | GS 3 + 4 |     |       | GS 4 + 3 |     |       | GS 8 |     |       | GS 9 - 10 |     |       |
|-------------|------------------|-----|--------|-----|-------|----------|-----|-------|----------|-----|-------|------|-----|-------|-----------|-----|-------|
|             |                  |     | cT1    | cT2 | cT3-4 | cT1      | cT2 | cT3-4 | cT1      | cT2 | cT3-4 | cT1  | cT2 | cT3-4 | cT1       | cT2 | cT3-4 |
| PSA < 7     | 1-20%            | ≥70 | 86     | 49  | 4     | 19       | 15  | 2     | 5        | 9   | 0     | 5    | 3   | 0     | 0         | 0   | 0     |
|             |                  | <70 | 50     | 39  | 5     | 5        | 5   | 0     | 0        | 2   | 0     | 0    | 0   | 0     | 0         | 0   | 0     |
|             | 21-50%           | ≥70 | 64     | 91  | 6     | 22       | 48  | 5     | 11       | 20  | 1     | 5    | 22  | 2     | 1         | 5   | 6     |
|             |                  | <70 | 24     | 39  | 4     | 7        | 16  | 1     | 2        | 7   | 0     | 2    | 4   | 2     | 0         | 2   | 1     |
|             | 51-80%           | ≥70 | 8      | 13  | 2     | 3        | 13  | 2     | 5        | 4   | 1     | 3    | 7   | 1     | 1         | 3   | 1     |
|             |                  | <70 | 5      | 12  | 0     | 2        | 3   | 2     | 1        | 2   | 1     | 2    | 1   | 1     | 0         | 3   | 3     |
|             | 81-100%          | ≥70 | 4      | 6   | 1     | 2        | 9   | 2     | 0        | 3   | 0     | 0    | 3   | 2     | 0         | 1   | 4     |
|             |                  | <70 | 1      | 11  | 0     | 1        | 1   | 2     | 1        | 0   | 0     | 0    | 4   | 0     | 0         | 2   | 0     |
| PSA 7-15    | 1-20%            | ≥70 | 74     | 53  | 1     | 18       | 14  | 0     | 6        | 9   | 1     | 9    | 6   | 1     | 1         | 3   | 0     |
|             |                  | <70 | 32     | 18  | 6     | 1        | 4   | 0     | 2        | 2   | 1     | 0    | 1   | 0     | 0         | 0   | 0     |
|             | 21-50%           | ≥70 | 55     | 108 | 10    | 20       | 64  | 6     | 10       | 28  | 3     | 10   | 22  | 5     | 5         | 8   | 1     |
|             |                  | <70 | 24     | 40  | 4     | 4        | 22  | 2     | 4        | 13  | 3     | 1    | 10  | 3     | 0         | 2   | 3     |
|             | 51-80%           | ≥70 | 12     | 23  | 6     | 5        | 24  | 2     | 0        | 18  | 2     | 2    | 8   | 3     | 1         | 6   | 2     |
|             |                  | <70 | 4      | 10  | 1     | 1        | 11  | 3     | 0        | 3   | 2     | 1    | 1   | 2     | 0         | 3   | 2     |
|             | 81-100%          | ≥70 | 5      | 16  | 0     | 3        | 13  | 6     | 4        | 7   | 1     | 2    | 13  | 3     | 1         | 9   | 6     |
|             |                  | <70 | 3      | 8   | 1     | 2        | 3   | 2     | 0        | 3   | 0     | 0    | 1   | 3     | 0         | 4   | 3     |
| PSA > 15    | 1-20%            | ≥70 | 22     | 14  | 0     | 5        | 7   | 1     | 2        | 7   | 0     | 4    | 4   | 1     | 0         | 0   | 0     |
|             |                  | <70 | 6      | 8   | 1     | 1        | 2   | 1     | 2        | 0   | 0     | 1    | 1   | 1     | 0         | 0   | 0     |
|             | 21-50%           | ≥70 | 14     | 25  | 5     | 5        | 13  | 5     | 3        | 14  | 2     | 4    | 16  | 4     | 1         | 8   | 3     |
|             |                  | <70 | 4      | 8   | 2     | 2        | 13  | 3     | 1        | 3   | 1     | 1    | 8   | 6     | 0         | 1   | 0     |
|             | 51-80%           | ≥70 | 1      | 15  | 2     | 3        | 13  | 5     | 1        | 3   | 4     | 2    | 13  | 6     | 1         | 11  | 0     |
|             |                  | <70 | 0      | 9   | 2     | 0        | 12  | 2     | 0        | 7   | 3     | 1    | 2   | 0     | 0         | 2   | 2     |
|             | 81-100%          | ≥70 | 1      | 15  | 2     | 0        | 15  | 6     | 1        | 12  | 3     | 0    | 13  | 8     | 0         | 10  | 14    |
|             |                  | <70 | 0      | 6   | 2     | 0        | 13  | 7     | 0        | 10  | 9     | 0    | 13  | 6     | 1         | 5   | 12    |

Figure 1-S – Graphical assessment of the Proportional Hazard assumption of the Cox model (observed data compared to predicted ones).

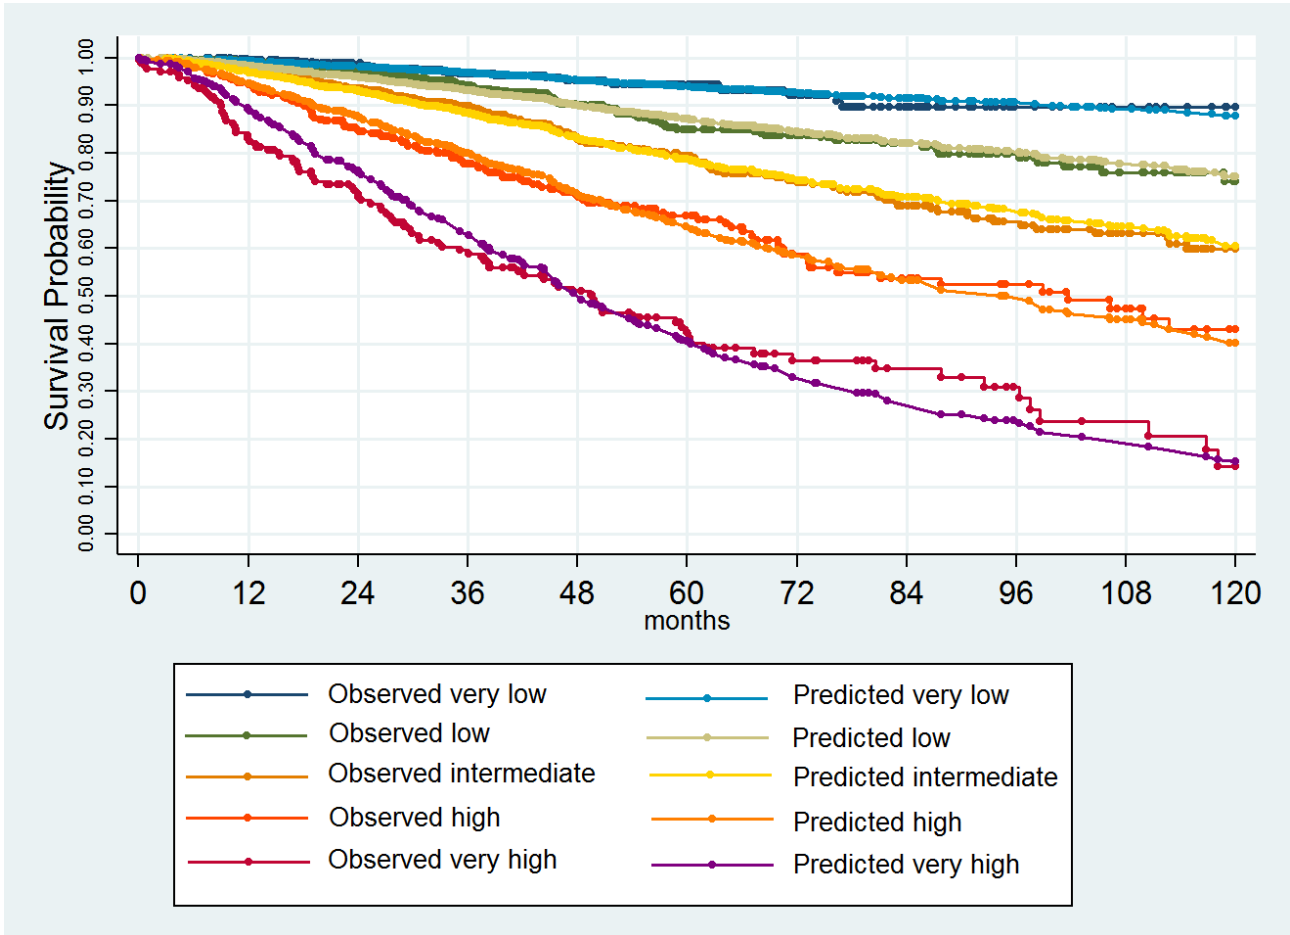

Supplement: MOESM1 [file 13014_2016_599_MOESM1_ESM.pdf]
